# Supplementary material
Source: Research Square preprint supplement (doi:10.21203/rs.3.rs-10070414/v1)
Supplement: Supplementary file 1 [file 3f3ad76ecf6364c2930ff347.docx]

**Table 1.** Epidemiological characteristics of domestic pigs and wild boars included in the study. Data are expressed as n (%). Animals were classified according to sex, age category and *Leishmania infantum* infection status based on ELISA and PCR analyses.

| **Variable** | | **Domestic pigs (n = 48)** | **Wild boars (n = 19)** | **Total (n = 67)** | ***p*-value** |
| --- | --- | --- | --- | --- | --- |
| Sex | Male | 15 (31.2%) | 10 (52.6%) | 25 (37.3 %) | 0.160 |
| Female | 33 (68.8%) | 9 (47.4%) | 42 (62.7%) |
| Age category | Piglet | 33 (68.8%) | 0 | 33 (49.3%) | **< 0.001** |
| Yearling | 14 (29.9%) | 11 (57.9%) | 25 (37.3%) |
| Adult | 1 (2.1%) | 8 (42.1%) | 9 (13.4%) |
| ELISA status | Negative | 44 (91.7%) | 17 (89.5%) | 61 (91.0%) | 1.000 |
| Positive | 4 (8.3%) | 2 (10.5%) | 6 (9.0%) |
| PCR status* | Negative | 13 (54.2%) | 11 (57.9%) | 24 (55.8%) | 1.000 |
| Positive | 11 (45.8%) | 8 (42.1%) | 19 (44.2%) |

*PCR results were available for 43 animals.

**Table 2.** Circulating cytokine concentrations in domestic pigs (*Sus scrofa domesticus*) and wild boars (*Sus scrofa*). Data are presented as median and interquartile range (IQR) because cytokine concentrations did not follow a normal distribution. Comparisons between host populations were performed using the Mann–Whitney U test. To account for multiple testing across the nine cytokines analysed, *p*-values were adjusted using the Benjamini–Hochberg false discovery rate (FDR) procedure. Effect size was estimated using Cliff’s delta (δ), a non-parametric measure of stochastic superiority. Cytokine concentrations are expressed as pg/mL. Statistically significant *p*-values and FDR-adjusted *p*-values (*p* < 0.05) are shown in bold. Negative Cliff’s delta values indicate higher cytokine concentrations in wild boars, whereas positive values indicate higher concentrations in domestic pigs.

| **Cytokine (pg/mL)** | **Domestic pigs median (IQR)** | | **Wild boars median (IQR)** | ***p*-values** | **FDR-adjusted *p*** | **Cliff’s δ** |
| --- | --- | --- | --- | --- | --- | --- |
| IL-1β | | 15.92 (9.64–37.42) | 64.72 (30.68–101.71) | 0.0048 | **0.0214** | -0.445 |
| IL-4 | | 1.77 (1.38–4.79) | 3.88 (1.38–5.22) | 0.4755 | 0.5336 | -0.113 |
| IL-6 | | 4.44 (2.89–11.79) | 92.83 (37.39–187.25) | <0.00001 | **< 0.00001** | -0.760 |
| IL-8 | | 124.64 (72.82–213.27) | 230.10 (61.26–999.44) | 0.2904 | 0.4356 | -0.168 |
| IL-10 | | 20.48 (13.97–37.45) | 7.59 (4.53–29.41) | 0.1352 | 0.2913 | 0.236 |
| IL-12/IL-23p40 | | 420.81 (111.14–699.06) | 156.18 (82.42–275.40) | 0.0143 | **0.0430** | 0.387 |
| IFN-α | | 1.55 (0.37–6.84) | 1.38 (0.37–2.25) | 0.1618 | 0.2913 | 0.220 |
| IFN-γ | | 2.49 (2.45–7.30) | 2.49 (2.33–7.30) | 0.4725 | 0.5336 | 0.112 |
| TNF-α | | 99.25 (46.56–167.66) | 79.23 (25.67–146.62) | 0.5336 | 0.5336 | 0.099 |

**Table 3.** Multivariable linear models evaluating the independent association between host population and circulating cytokine concentrations. Cytokine concentrations were log-transformed [log (x + 1)] prior to analysis. Models included host population, age category, sex, PCR status and ELISA status as explanatory variables. Regression coefficients (β) represent the estimated effect of wild boar relative to domestic pig (reference category), while holding all other variables constant. Values are presented as β coefficients with their corresponding 95% confidence intervals (95% CI). *P*-values were adjusted for multiple testing using the Benjamini–Hochberg false discovery rate (FDR) procedure. Statistically significant p-values and FDR-adjusted *p*-values (*p* < 0.05) are shown in bold.

| **Cytokine** | **β [95% CI] (Wild boar)** | ***p*-value** | **FDR-adjusted *p*** |
| --- | --- | --- | --- |
| IL-1β | 0.617 [-0.69-1.93] | 0.362 | 0.613 |
| IL-4 | 0.349 [-0.57-1.27] | 0.462 | 0.613 |
| IL-6 | 2.475 [1.33-3.62] | 0.00015 | **0.00135** |
| IL-8 | 0.371 [-1.05-1.80] | 0.613 | 0.613 |
| IL-10 | 0.978 [-0.59-2.55] | 0.230 | 0.613 |
| IL-12/IL-23p40 | 0.255 [-0.72-1.23] | 0.611 | 0.613 |
| IFN-α | 0.242 [-0.56-1.05] | 0.560 | 0.613 |
| IFN-γ | 0.400 [-0.006-0.86] | 0.099 | 0.445 |
| TNF-α | -0.426[-1.48-0.63] | 0.433 | 0.613 |
