# Supplementary material
Source: Research Square preprint supplement (doi:10.21203/rs.3.rs-10070414/v1)
Supplement: Supplementary file 2 [file 8f98d395a8efe3e0e101940b.docx]

**Supplementary files**

**Supplementary Figure S1**. Spearman correlation matrix of circulating cytokine concentrations across all animals included in the study. Colours indicate the direction and magnitude of pairwise correlations, with red representing positive correlations and blue representing negative correlations. Correlation coefficients (ρ) are displayed within cells. Cytokine concentrations were analysed using Spearman’s rank correlation coefficient due to non-normal data distribution. Hierarchical clustering was applied to identify groups of cytokines with similar correlation patterns.

**Supplementary Figure S2.** Distribution of circulating IL-6 concentrations in yearling domestic pigs and wild boars. Boxplots show the median and interquartile range (IQR), whiskers indicate the minimum and maximum values, and points represent individual animals. Cytokine concentrations are expressed as pg/mL. Comparisons between host populations were performed using the Mann–Whitney U test and *p*-values were adjusted using the Benjamini-Hochberg false discovery rate procedure. This sensitivity analysis was conducted to evaluate the potential influence of age structure on the observed host-associated differences in IL-6 concentrations.

**Supplementary Figure S3.** Distribution of circulating IL-6 concentrations according to host population and PCR status. Boxplots show the median and interquartile range (IQR), whiskers indicate the minimum and maximum values, and points represent individual animals. Cytokine concentrations are expressed as pg/mL. Animals were classified according to host population (domestic pig or wild boar) and molecular status (PCR-positive or PCR-negative). This sensitivity analysis was conducted to evaluate the relationship between host population, molecular evidence of infection and circulating IL-6 concentrations.

**Supplementary Table S1.** Loadings of cytokine variables for the first two principal components (PC1 and PC2) derived from principal component analysis (PCA). Cytokine concentrations were log-transformed [log (x + 1)] and auto-scaled prior to analysis. Loadings represent the contribution of each cytokine to the corresponding principal component. Positive and negative values indicate the direction of the association with each component, whereas larger absolute values indicate a stronger contribution to the variance explained. PC1 and PC2 accounted for 41.2% and 14.4% of the total variance, respectively.

| **Cytokine** | **PC1** | **PC2** |
| --- | --- | --- |
| IL-1β | 0.421 | -0.269 |
| IL-4 | 0.430 | -0.188 |
| IL-6 | 0.311 | -0.265 |
| IL-8 | 0.276 | -0.247 |
| IL-10 | 0.209 | 0.271 |
| IL-12/IL-23p40 | 0.291 | 0.520 |
| IFN-α | 0.317 | 0.431 |
| IFN-γ | 0.305 | 0.375 |
| TNF-α | 0.378 | -0.301 |

**Supplementary Table S2.** Circulating cytokine concentrations according to sex. Data are presented as median and interquartile range (IQR). Comparisons between females and males were performed using the Mann–Whitney U test. Cytokine concentrations are expressed as pg/mL.

| **Cytokine (pg/mL)** | **Females median (IQR)** | **Males median (IQR)** | ***p*-value** |
| --- | --- | --- | --- |
| IL-1β | 16.47 (12.72–72.79) | 35.27 (15.92–51.96) | 0.668 |
| IL-4 | 2.33 (1.38–6.61) | 2.36 (1.38–4.79) | 0.620 |
| IL-6 | 9.17 (3.47–37.08) | 5.42 (2.89–52.04) | 0.271 |
| IL-8 | 137.42 (77.18–382.47) | 122.09 (66.77–201.99) | 0.347 |
| IL-10 | 16.33 (8.52–52.74) | 20.48 (7.59–36.48) | 0.876 |
| IL-12/IL-23p40 | 247.68 (75.07–576.83) | 337.13 (189.50–620.84) | 0.131 |
| IFN-α | 0.75 (0.37–4.80) | 2.35 (1.00–3.88) | 0.348 |
| IFN-γ | 2.49 (2.37–7.18) | 2.49 (2.33–7.30) | 0.963 |
| TNF-α | 99.13 (37.03–239.43) | 99.25 (32.27–140.72) | 0.540 |

**Supplementary Table S3**. Comparison of circulating cytokine concentrations between domestic pigs and wild boars after exclusion of all PCR-positive animals. Data are presented as median and interquartile range (IQR). Comparisons were performed using the Mann–Whitney U test. Cytokine concentrations are expressed as pg/mL. This sensitivity analysis was conducted to evaluate whether the observed host-associated cytokine differences persisted after removing animals with molecular evidence of *Leishmania* infection. Statistically significant *p*-values (*p* < 0.05) are shown in bold.

| **Cytokine** | **Domestic pigs median (IQR)** | **Wild boars median (IQR)** | ***p*-value** |
| --- | --- | --- | --- |
| IL-1β | 15.92 (12.16–35.27) | 67.30 (43.61–140.29) | **0.0120** |
| IL-4 | 1.67 (1.38–3.25) | 4.08 (1.38–5.22) | 0.292 |
| IL-6 | 3.47 (2.89–7.83) | 52.04 (27.35–370.31) | **0.0001** |
| IL-8 | 116.47 (70.40–201.99) | 410.58 (52.88–999.44) | 0.194 |
| IL-10 | 20.48 (13.97–36.48) | 4.53 (4.29–24.95) | 0.103 |
| IL-12/IL-23p40 | 478.23 (224.08–719.53) | 189.50 (82.42–298.01) | **0.0198** |
| IFN-α | 1.16 (0.37–7.38) | 1.76 (1.17–2.35) | 0.786 |
| IFN-γ | 3.70 (2.33–7.30) | 2.33 (2.33–4.89) | 0.112 |
| TNF-α | 99.25 (19.08–140.72) | 66.19 (25.67–204.46) | 0.795 |

**Supplementary Table S4**. Comparison of circulating cytokine concentrations between domestic pigs and wild boars in animals with available PCR results. Data are presented as median and interquartile range (IQR). Comparisons were performed using the Mann–Whitney U test. Cytokine concentrations are expressed as pg/mL. This sensitivity analysis was conducted to assess whether the observed host-associated cytokine differences were influenced by missing molecular data. Statistically significant *p*-values (*p* < 0.05) are shown in bold.

| **Cytokine** | **Domestic pigs median (IQR)** | **Wild boars median (IQR)** | **p-value** |
| --- | --- | --- | --- |
| IL-1β | 15.92 (8.08–28.39) | 64.72 (30.68–101.71) | **0.0028** |
| IL-4 | 2.36 (1.62–4.79) | 3.88 (1.38–5.22) | 0.573 |
| IL-6 | 4.44 (3.47–8.46) | 92.83 (37.39–187.25) | **<0.0001** |
| IL-8 | 130.44 (99.14–262.58) | 230.10 (61.26–999.44) | 0.642 |
| IL-10 | 20.48 (13.97–36.48) | 7.59 (4.53–29.41) | 0.230 |
| IL-12/IL-23p40 | 343.04 (79.09–699.06) | 156.18 (82.42–275.40) | 0.089 |
| IFN-α | 0.73 (0.37–2.92) | 1.38 (0.37–2.25) | 0.951 |
| IFN-γ | 2.49 (2.45–3.98) | 2.49 (2.33–7.30) | 0.900 |
| TNF-α | 99.25 (66.19–143.67) | 79.23 (25.67–146.62) | 0.404 |
